# Supplementary material
Source: ML conference proceedings conference paper supplement (https://openaccess.thecvf.com/content/CVPR_2019/html/Lemaire_Structured_Pruning_of_CVPR_2019_paper.html)
Supplement: Supplementary file 1 [file Lemaire_Structured_Pruning_of_CVPR_2019_supplemental.pdf]

# Supplementary Materials for “Structured Pruning of Neural Networks with Budget-Aware Regularization”

## 1. Sigmoidal Transition Function

The sigmoidal transition function of Section 3.4 is defined as follows:

$$T(t, d) = \frac{\text{Sigmoid}(d(t - 0.5)) - \delta}{1 - 2\delta} \quad (1)$$

$$\delta = \text{Sigmoid}(-0.5d)$$

where  $d$  controls the “hardness” of the sigmoid curve.  $d \rightarrow 0$  gives a linear transition, and  $d \rightarrow \infty$  gives a hard sigmoid.  $d = 10$  was found empirically to be effective. The sigmoid must be shifted by  $\delta$  and scaled by  $(1 - 2\delta)$  so that  $T(0, d) = 0$  and  $T(1, d) = 1$ .

## 2. Mixed Block Implementation

In Algorithm 1 below, we present an implementation for the atypical connectivity presented in Figure 4 of the paper. While the input and delta tensors have the same number of prunable features, they can have a different pruning mask. We use indexing operations to exclude pruned features from the computations.

Note that, in the case where the block is responsible of performing a downsampling of the input tensor (or augmenting the number of features, or both), the residual connection is not an identity function; rather, it is a convolution  $f_{\text{res}}(\cdot)$  that can have pruned features.

---

**Algorithm 1:** Forward Pass for the Mixed Block

---

**Data:**

$x_{\text{in}}$  : Input tensor of size (batch\_size, n\_features, height, width)

$f_{\Delta}(\cdot)$  : Delta branch function

$i_{\text{in}}$  : Indices of alive features in input tensor

$i_{\Delta}$  : Indices of alive features in delta tensor

$f_{\text{res}}(\cdot)$  : Residual branch function (can be  $\emptyset$  if identity connection)

$i_{\text{res}}$  : Indices of alive features in output of residual function (if  $f_{\text{res}}(\cdot) \neq \emptyset$ )

$N_{\text{res}}$  : Number of output features of unpruned residual function (if  $f_{\text{res}}(\cdot) \neq \emptyset$ )

**Result:**  $x_{\text{out}}$  : Output tensor

```

1  $x_{\text{alive}} \leftarrow x_{\text{in}}[:, i_{\text{in}}, :, :]$ 
2 if  $f_{\text{res}}(\cdot) = \emptyset$  then
3    $x_{\text{out}} \leftarrow i_{\text{in}}$ 
4 else
5    $x_{\text{res}} \leftarrow f_{\text{res}}(x_{\text{alive}})$ 
6   height, width  $\leftarrow$  get_height( $x_{\text{res}}$ ), get_width( $x_{\text{res}}$ )
7    $x_{\text{out}} \leftarrow$  zeros(batch_size,  $N_{\text{res}}$ , height, width)
8    $x_{\text{out}}[:, i_{\text{res}}, :, :] \leftarrow x_{\text{res}}$ 
9  $\Delta \leftarrow f_{\Delta}(x_{\text{alive}})$ 
10  $x_{\text{out}}[:, i_{\Delta}, :, :] \leftarrow x_{\text{out}}[:, i_{\Delta}, :, :] + \Delta$ 

```

---

## 3. Training Schedules

Here, we give details about the number of epochs used for each training phase and for each method.

### 3.1. Training Schedule for LZR, IB, MorphNet and Our Method

**LZR[22], IB[1] and Ours** For CIFAR-10 and CIFAR-100, we first train for 80 epochs. Then, the network is “hard-pruned” using the algorithm associated to the pruning method. Next, we freeze  $\Phi$ , and we train for 40 additional epochs. Finally, we reduce the learning rate from  $10^{-3}$  to  $10^{-4}$  and train for 10 more epochs. For Mio-TCD, we shorten the three stages to (40, 20, 10) epochs (this dataset is  $\sim 10\times$  larger). For Mio-TCD only, we initialize the weights to those of the full (unpruned) network (c.f. Section 3.3).

**MorphNet[9]** For CIFAR-10 and CIFAR-100, we first train for 60 epochs. Then, the network is “hard-pruned” using the algorithm proposed by the original paper. Next, we train for 50 additional epochs. Finally, we reduce the learning rate from  $10^{-3}$  to  $10^{-4}$  and train for 20 more epochs. For Mio-TCD, we shorten the three stages to (40, 20, 10) epochs.

### 3.2. Pruning Scheme for Random, VM, VQ and ID

For *Random*, *WM*[10], *VQ*[8], and *ID*[6,16], we implemented the following pruning scheme which revealed to be effective and efficient:

1. Perform initial training of the full network for 40 epochs;
2. Reduce learning rate and continue training for 10 epochs;
3. Prune 50% of the network’s volume  $V$ ;
4. Train the network again with high learning rate, for 40 epochs;
5. Reduce learning rate and continue training for 10 epochs;
6. Record the network performance for the current pruning factor;
7. Return to 3 for the remaining pruning steps.

This scheme leads to four pruning factors: 2, 4, 8, 16.

### 3.3. Training Schedule for the Full (Unpruned) Networks

For CIFAR-10 and CIFAR-100, we trained for 80 epochs at learning rate  $10^{-3}$ , and 10 more epochs at learning rate  $10^{-4}$ . For Mio-TCD, a dataset  $\sim 10\times$  larger, we trained for 40 epochs at high learning rate and 10 epochs at low learning rate.

## 4. Initialization of Dropout Sparsity Parameters $\Phi$

For LZR, where  $\Phi := \{\alpha_l\}$ , we initialized all  $\alpha$  from a uniform distribution  $\mathcal{U}(0, 0.01)$ . We did not observe a significant change between using  $\mathcal{U}(0, 0.01)$  or  $\mathcal{N}(0, 0.01^2)$  (the initialization distribution suggested by [22]). Our method has the same  $\Phi$  and initialization scheme than LZR[22]. For IB, where  $\Phi := \{\mu_l, \sigma_l\}$ , we initialized the parameters from Gaussian distributions:  $\mu \sim \mathcal{N}(1, 0.01^2)$ ,  $\log \sigma \sim \mathcal{N}(-9, 0.01^2)$  (values obtained by personal communication with the authors [1]).

## 5. Impact of Mixed-Connectivity Block on Metrics

Here we compare the objective metrics (i.e. Activation Volume  $V$  and FLOP) when the regular Resblock is used and when our Mixed-Connectivity block is used. These are the results obtained from our method (BAR).  $\Delta$  is the relative difference to the results for the Regular block. The following three tables provide further details to Table 2 in the paper.

### 5.1. CIFAR-10

| Pruning Factor | Activation Volume ( $V$ ) |          |          | FLOP     |          |          |
|----------------|---------------------------|----------|----------|----------|----------|----------|
|                | Regular                   | Mixed    | $\Delta$ | Regular  | Mixed    | $\Delta$ |
| 2              | 1.79E+06                  | 1.58E+06 | -12%     | 2.71E+09 | 2.35E+09 | -13%     |
| 4              | 1.37E+06                  | 7.88E+05 | -43%     | 1.51E+09 | 9.49E+08 | -37%     |
| 8              | 8.43E+05                  | 3.93E+05 | -53%     | 8.06E+08 | 4.46E+08 | -45%     |
| 16             | 4.67E+05                  | 1.97E+05 | -58%     | 4.20E+08 | 2.20E+08 | -48%     |

## 5.2. CIFAR-100

| Pruning Factor | Activation Volume (V) |          |          | FLOP     |          |          |
|----------------|-----------------------|----------|----------|----------|----------|----------|
|                | Regular               | Mixed    | $\Delta$ | Regular  | Mixed    | $\Delta$ |
| 2              | 1.84E+06              | 1.58E+06 | -14%     | 2.68E+09 | 2.29E+09 | -15%     |
| 4              | 1.53E+06              | 7.88E+05 | -49%     | 1.85E+09 | 1.10E+09 | -40%     |
| 8              | 8.76E+05              | 3.93E+05 | -55%     | 1.08E+09 | 6.03E+08 | -44%     |
| 16             | 4.59E+05              | 1.97E+05 | -57%     | 6.21E+08 | 3.27E+08 | -47%     |

## 5.3. Mio-TCD

| Pruning Factor | Activation Volume (V) |          |          | FLOP     |          |          |
|----------------|-----------------------|----------|----------|----------|----------|----------|
|                | Regular               | Mixed    | $\Delta$ | Regular  | Mixed    | $\Delta$ |
| 2              | 2.66E+06              | 1.81E+06 | -32%     | 1.15E+09 | 8.33E+08 | -28%     |
| 4              | 1.45E+06              | 9.07E+05 | -37%     | 2.50E+08 | 1.56E+08 | -38%     |
| 8              | 7.51E+05              | 4.54E+05 | -40%     | 6.87E+07 | 3.98E+07 | -42%     |
| 16             | 4.70E+05              | 2.26E+05 | -52%     | 3.31E+07 | 1.66E+07 | -50%     |

## 6. Pruning Results

Here we give the numbers that we used to plot the curves of Figures 6 and 8. All methods prune according to the Activation Volume  $V$ , except for “Ours (F-trained)”, which prunes with a FLOP reduction objective. Please note that results with a volume factor greater than 16 have not been included.

### 6.1. CIFAR-10

| Method | V factor | F factor | Test Accu. | Method           | V factor | F factor | Test Accu. |
|--------|----------|----------|------------|------------------|----------|----------|------------|
| Random | 2.0      | 4.0      | 0.8963     | LZR              | 1.1      | 1.2      | 0.9182     |
|        | 4.0      | 16.0     | 0.8802     |                  | 2.1      | 5.3      | 0.9204     |
|        | 8.0      | 64.0     | 0.8462     |                  | 4.3      | 38.1     | 0.9210     |
|        | 16.0     | 255.8    | 0.8136     |                  | 7.3      | 62.0     | 0.9171     |
| VQ     | 3.1      | 9.4      | 0.9124     | IB               | 15.8     | 167.4    | 0.8970     |
|        | 4.6      | 21.0     | 0.9089     |                  | 1.3      | 1.8      | 0.9085     |
|        | 8.1      | 64.9     | 0.8862     |                  | 1.3      | 1.8      | 0.9128     |
|        | 16.0     | 256.7    | 0.8459     |                  | 2.3      | 5.2      | 0.9097     |
| WM     | 2.0      | 4.0      | 0.9111     | MorphNet         | 5.8      | 38.6     | 0.9048     |
|        | 4.0      | 16.0     | 0.9120     |                  | 7.4      | 79.9     | 0.9014     |
|        | 8.0      | 64.0     | 0.8968     |                  | 9.5      | 113.7    | 0.8965     |
|        | 16.0     | 255.8    | 0.8633     |                  | 15.2     | 196.4    | 0.8795     |
| ID     | 2.0      | 4.0      | 0.9109     | Ours             | 2.0      | 4.0      | 0.9325     |
|        | 4.0      | 16.0     | 0.9144     |                  | 4.0      | 16.0     | 0.9289     |
|        | 8.0      | 64.0     | 0.9037     |                  | † 7.9    | 64.0     | 0.9066     |
|        | 16.0     | 255.8    | 0.8692     |                  | † 15.8   | 255.8    | 0.8643     |
| Ours   | 2.0      | 6.4      | 0.9270     | Ours (F-trained) | 1.7      | 4.0      | 0.9395     |
|        | 4.0      | 15.9     | 0.9278     |                  | 2.9      | 16.0     | 0.9350     |
|        | † 7.9    | 33.8     | 0.9280     |                  | 4.4      | † 63.9   | 0.9217     |
|        | † 15.8   | 68.5     | 0.9162     |                  | 6.1      | 256.0    | 0.9010     |

The results marked with a dagger (†) are slightly below target because of a slight miscalculation of the total volume and of the budget; this has since been fixed in our implementation.

## 6.2. CIFAR-100

| Method | V factor | F factor | Test Accu. | Method   | V factor | F factor | Test Accu. |
|--------|----------|----------|------------|----------|----------|----------|------------|
| Random | 2.0      | 4.0      | 0.6751     | LZR      | 1.0      | 1.1      | 0.7201     |
|        | 4.0      | 16.0     | 0.6364     |          | 2.0      | 6.0      | 0.7039     |
|        | 8.0      | 64.0     | 0.5922     |          | 3.0      | 31.9     | 0.7152     |
|        | 16.0     | 255.8    | 0.4888     |          | 6.6      | 57.5     | 0.7075     |
| VQ     | 2.5      | 9.4      | 0.6963     |          | 13.0     | 110.6    | 0.6728     |
|        | 4.3      | 21.0     | 0.6927     | IB       | 1.2      | 1.5      | 0.7127     |
|        | 8.0      | 64.9     | 0.6703     |          | 1.3      | 1.8      | 0.7093     |
|        | 16.0     | 256.7    | 0.5899     |          | 2.0      | 3.1      | 0.7079     |
| 4.8    |          |          |            |          | 24.9     | 0.6508   |            |
| WM     | 2.0      | 4.0      | 0.6898     |          | 6.3      | 58.5     | 0.6905     |
|        | 4.0      | 16.0     | 0.6910     |          | 8.8      | 94.3     | 0.5709     |
|        | 8.0      | 64.0     | 0.6542     |          | 12.7     | 148.5    | 0.5671     |
|        | 16.0     | 255.8    | 0.5899     |          |          |          |            |
| ID     | 2.0      | 4.0      | 0.6929     | MorphNet | 2.0      | 4.0      | 0.7359     |
|        | 4.0      | 16.0     | 0.6975     |          | 4.0      | 16.0     | 0.7042     |
|        | 8.0      | 64.0     | 0.6603     |          | † 7.9    | 64.0     | 0.6494     |
|        | 16.0     | 255.8    | 0.5913     |          | † 15.8   | 255.8    | 0.5549     |
| Ours   | 2.0      | 6.6      | 0.7408     |          |          |          |            |
|        | 4.0      | 13.7     | 0.7359     |          |          |          |            |
|        | † 7.9    | 25.0     | 0.7259     |          |          |          |            |
|        | † 15.8   | 46.2     | 0.7053     |          |          |          |            |

The dagger (†) has the same meaning as in the previous table.

## 6.3. Mio-TCD

| Method | V factor | F factor | Test Accu. | Method   | V factor | F factor | Test Accu. |
|--------|----------|----------|------------|----------|----------|----------|------------|
| Random | 2.0      | 4.0      | 0.9417     | LZR      | 1.0      | 1.0      | 0.9521     |
|        | 4.0      | 16.0     | 0.9330     |          | 1.0      | 1.0      | 0.9509     |
|        | 8.0      | 63.7     | 0.9191     |          | 1.0      | 1.0      | 0.9524     |
|        | 16.0     | 253.7    | 0.9119     |          | 1.6      | 2.9      | 0.9524     |
| VQ     | 3.6      | 12.6     | 0.9504     |          | 3.8      | 14.8     | 0.9507     |
|        | 5.5      | 30.0     | 0.9472     |          | 11.7     | 201.6    | 0.9510     |
|        | 8.7      | 75.8     | 0.9448     | IB       | 1.4      | 2.3      | 0.9509     |
|        | 16.3     | 266.3    | 0.9343     |          | 1.9      | 3.1      | 0.9516     |
| 7.5    |          |          |            |          | 57.3     | 0.9478   |            |
| WM     | 2.0      | 4.0      | 0.9497     |          |          | 11.5     | 145.0      |
|        | 4.0      | 16.0     | 0.9507     |          | 14.2     | 192.6    | 0.9127     |
|        | 8.0      | 63.7     | 0.9488     |          | 15.2     | 232.6    | 0.9070     |
|        | 16.0     | 253.7    | 0.9406     |          |          |          |            |
| ID     | 2.0      | 4.0      | 0.9512     | MorphNet | 2.0      | 4.0      | 0.9709     |
|        | 4.0      | 16.0     | 0.9493     |          | 4.0      | 16.0     | 0.9681     |
|        | 8.0      | 63.7     | 0.9461     |          | 8.0      | 63.7     | 0.9590     |
|        | 16.0     | 253.7    | 0.9376     |          | 16.0     | 253.7    | 0.9396     |
| Ours   | 2.0      | 3.1      | 0.9536     |          |          |          |            |
|        | 4.0      | 16.7     | 0.9543     |          |          |          |            |
|        | 8.0      | 65.1     | 0.9567     |          |          |          |            |
|        | 16.1     | 156.7    | 0.9534     |          |          |          |            |

## 6.4. TinyImageNet

| Method | V factor | F factor | Test Accu. | Method   | V factor | F factor | Test Accu. |
|--------|----------|----------|------------|----------|----------|----------|------------|
| Random | 2.0      | 4.0      | 0.4825     | Ours     | 2.0      | 4.0      | 0.5235     |
|        | 4.0      | 16.0     | 0.4608     |          | 4.0      | 16.0     | 0.5198     |
|        | 8.0      | 63.7     | 0.3941     |          | 8.0      | 63.7     | 0.5140     |
|        | 16.0     | 253.7    | 0.2953     |          | 16.0     | 253.7    | 0.5196     |
| VQ     | 2.5      | 6.2      | 0.4896     | LZR      | 3.4      | 38.8     | 0.5034     |
|        | 4.2      | 18.0     | 0.4993     |          | 4.0      | 55.3     | 0.5001     |
|        | 8.0      | 64.3     | 0.4842     |          | 5.5      | 73.8     | 0.4971     |
|        | 16.0     | 255.9    | 0.3926     |          | 9.6      | 108.3    | 0.4903     |
| WM     | 2.0      | 4.0      | 0.4901     | IB       | 2.0      | 3.9      | 0.4445     |
|        | 4.0      | 16.0     | 0.4967     |          | 4.2      | 18.0     | 0.4282     |
|        | 8.0      | 63.7     | 0.4772     |          | 6.4      | 41.3     | 0.3757     |
|        | 16.0     | 253.7    | 0.4019     |          | 12.7     | 161.7    | 0.3513     |
| ID     | 2.0      | 4.0      | 0.4996     | MorphNet | 2.0      | 4.0      | 0.5815     |
|        | 4.0      | 16.0     | 0.4955     |          | 4.0      | 16.0     | 0.5577     |
|        | 8.0      | 63.7     | 0.4577     |          | 8.0      | 63.7     | 0.5169     |
|        | 16.0     | 253.7    | 0.3972     |          | 16.0     | 253.7    | 0.3919     |

## 7. Pruning Results

In Fig. 1, we show pruning results of our method on TinyImageNet, CIFAR-100, and Mio-TCD (result on CIFAR-10 is in the paper).

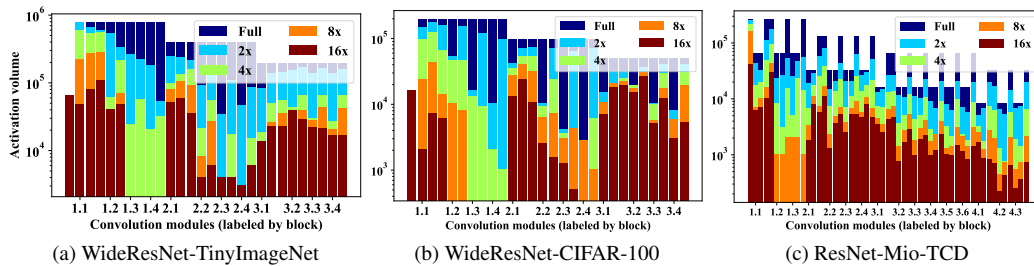

Figure 1: **Result of pruning with our method.** Total number of active neurons in the full networks and with four different pruning rates. Sections without an orange (8x) or red (16x) bar are those for which a res-Block has been eliminated.

## 8. Sensitivity Analysis

Here we show sensitivity analysis results for our method on all 4 datasets. For each of the 4 pruning factors, we run 10 experiments, where we sample the value of 7 hyperparameters from a uniform distribution centered around their tuned value. Depending on the scale of the parameter, the width of the interval is either  $10^{-5}$ , 0.2, or 1.0. We have plotted the results of this analysis in Fig. 2, using the data shown in Table 1. As one can see, our method is not over sensitive to changes of its hyperparameters.

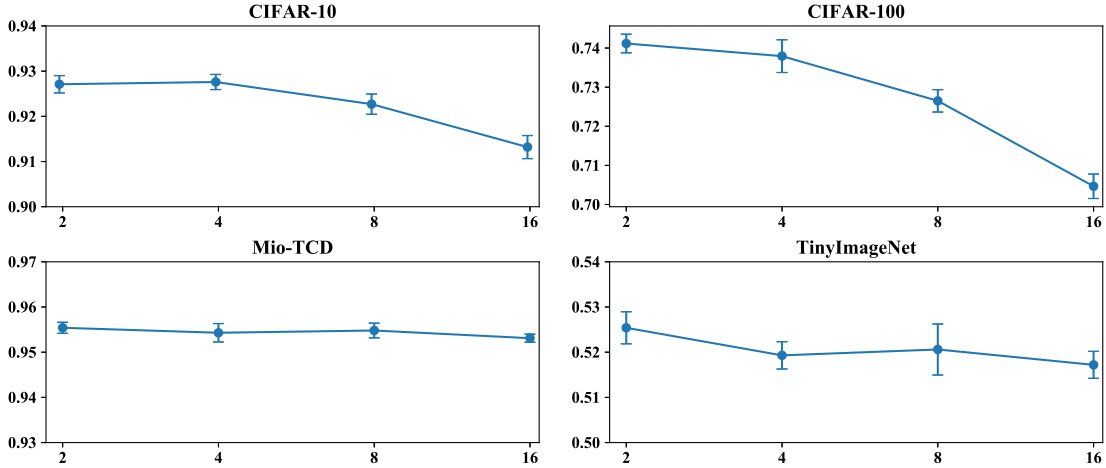

Figure 2: Sensitivity analysis with error bars

| V Factor | Test Accuracy | Std dev. |
|----------|---------------|----------|
| 2        | 0.9271        | 0.001915 |
| 4        | 0.9276        | 0.001674 |
| 8        | 0.9227        | 0.002244 |
| 16       | 0.9132        | 0.002552 |

(a) CIFAR-10

| V Factor | Test Accuracy | Std dev. |
|----------|---------------|----------|
| 2        | 0.7412        | 0.002384 |
| 4        | 0.7379        | 0.004185 |
| 8        | 0.7265        | 0.002860 |
| 16       | 0.7047        | 0.003129 |

(b) CIFAR-100

| V Factor | Test Accuracy | Std dev. |
|----------|---------------|----------|
| 2        | 0.9554        | 0.001222 |
| 4        | 0.9543        | 0.002039 |
| 8        | 0.9548        | 0.001631 |
| 16       | 0.9531        | 0.000903 |

(c) Mio-TCD

| V Factor | Test Accuracy | Std dev. |
|----------|---------------|----------|
| 2        | 0.5254        | 0.003548 |
| 4        | 0.5193        | 0.003017 |
| 8        | 0.5206        | 0.005651 |
| 16       | 0.5172        | 0.002984 |

(d) TinyImageNet

Table 1: Sensitivity analysis data

## 9. Dropout Sparsity Learning with the Hard Concrete Distribution

We describe the Hard Concrete distribution, and how it can be used for Dropout Sparsity Learning.

### 9.1. The Hard Concrete Distribution

The Hard Concrete distribution [22] (HC) is a modification of the Binary Concrete distribution (BC), which in turn is a special case of the Concrete distribution from Maddison et al. (2017). The BC is a continuous relaxation of the Bernoulli distribution. The HC has the advantage of allowing to put significant mass on  $P(z = 0)$ , where  $z \in [0, 1]$  is the relevance of a neuron (or group of neurons). We are interested in drawing samples  $z$  from the HC, which can be done by using  $z = Q_{\text{HC}}^{-1}(\epsilon|\phi)$ , where  $Q^{-1}$  is the inverse cumulative distribution function (ICDF) and  $\epsilon \sim \mathcal{U}(0, 1)$ . Fig. 3 compares the probability density functions (PDF) and ICDF of the BC and the HC distributions.

The PDF  $q_{\text{BC}}(s|\phi)$  and CDF  $Q_{\text{BC}}(s|\phi)$  of the BC have parameters  $\phi := (\alpha, \beta)$  and are defined as follows:

$$q_{\text{BC}}(s|\phi) = \frac{\beta\alpha s^{-\beta-1}(1-s)^{-\beta-1}}{(\alpha s^{-\beta} + (1-s)^{-\beta})^2} \quad (2)$$

$$Q_{\text{BC}}(s|\phi) = \text{Sigmoid}((\log s - \log(1-s))\beta - \log \alpha). \quad (3)$$

To obtain the HC, we stretch the domain of  $q_{\text{BC}}$  to the  $(\gamma, \zeta)$  interval, with  $\gamma < 0$  and  $\zeta > 1$ . Since this stretching operation results in some probability mass being outside  $[0, 1]$ , we assign the mass of  $[\gamma, 0]$  and  $[1, \zeta]$  to  $P(z = 0)$  and  $P(z = 1)$ , respectively. For example, with  $\log \alpha = 0$ ,  $P(z = 0) =$

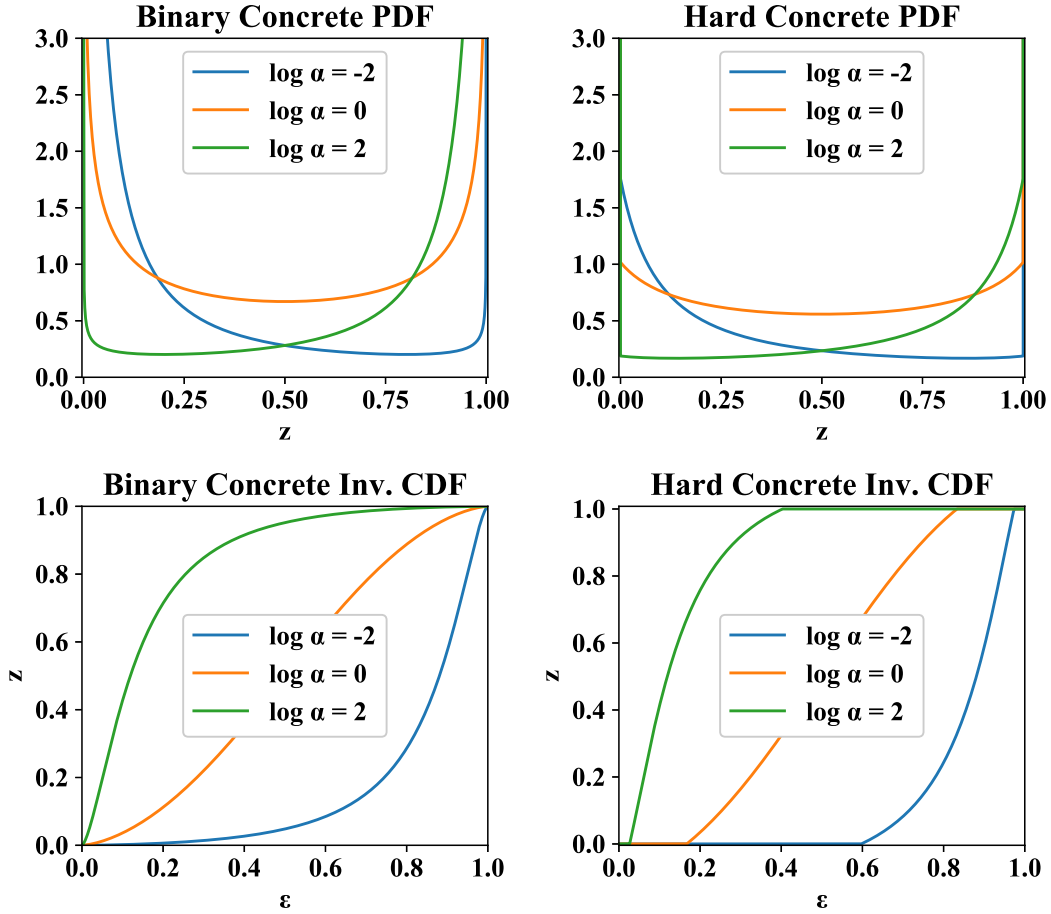

Figure 3: **Comparison of the BC and the HC distributions.** The parameters  $\beta, \gamma, \zeta$  are set to  $2/3, -0.1, 1.1$ .

$P(z = 1) \approx 0.23$ . The resulting PDF is better understood visually (c.f. Fig. 3). The HC distribution has parameters  $\phi := (\alpha, \beta, \gamma, \zeta)$ , and we set  $\beta, \gamma, \zeta$  to  $2/3, -0.1, 1.1$  for all our experiments, as per [22].

For our purposes, we only need to draw samples for the HC, which can be done with its inverse CDF. In our experiments, we use the following formula, given by [22] :

$$Q_{\text{HC}}^{-1}(\epsilon|\phi) = \text{Clamp}_{0,1} \left[ \text{Sigmoid} \left( \frac{\log \epsilon - \log(1 - \epsilon) + \log \alpha}{\beta} \right) (\zeta - \gamma) + \gamma \right]. \quad (4)$$

## 9.2. The Hard Concrete Sparsity Loss

We define our sparsity loss as the expectation of the  $L_0$  norm of the set of all dropout variables  $z$ . We replace this discrete norm by a continuous relaxation  $L_{\text{HC}}(\Phi)$ , where  $\Phi := \{\phi_i\}$  and  $\phi := (\alpha, \beta, \gamma, \zeta)$  :

$$L_{\text{HC}}(\Phi) = \sum_{\phi \in \Phi} P_{\phi}(z > 0) = \sum_{\phi \in \Phi} (1 - Q_{\text{HC}}(0|\phi)) = \sum_{\phi \in \Phi} \text{Sigmoid}(\log \alpha - \beta \log \frac{-\gamma}{\zeta}) \quad (5)$$
